# Supplementary material
Source: PubMed Central journal article supplement (PMC9072810)
Supplement: mmc1.pdf [file mmc1.pdf]

## **In-duct Grating-like Dielectric Barrier Discharge System for Air Disinfection**

Liyang Zhang<sup>1</sup>, Yuntao Guo<sup>1\*</sup>, Xuanyu Chang<sup>2</sup>, Zenghui Yao<sup>3</sup>, Xiaodong Wei<sup>2</sup>, Zihao Feng<sup>1</sup>, Dongheyu Zhang<sup>1</sup>, Qun Zhou<sup>4</sup>, Xinxin Wang<sup>1</sup>, Haiyun Luo<sup>1\*</sup>

<sup>1</sup> Department of Electrical Engineering, Tsinghua University, Beijing, China

<sup>2</sup> Marine Design and Research Institute of China (MARIC), Shanghai, China

<sup>3</sup> School of Electrical and Electronic Engineering, North China Electric Power University, Beijing, China

<sup>4</sup> Department of Chemistry, Tsinghua University, Beijing, China

Please correspond to:

\*Prof. Haiyun Luo

Email: [lhy@tsinghua.edu.cn](mailto:lhy@tsinghua.edu.cn)

or \*Dr. Yuntao Guo

E-mail: [guoyt@tsinghua.edu.cn](mailto:guoyt@tsinghua.edu.cn)

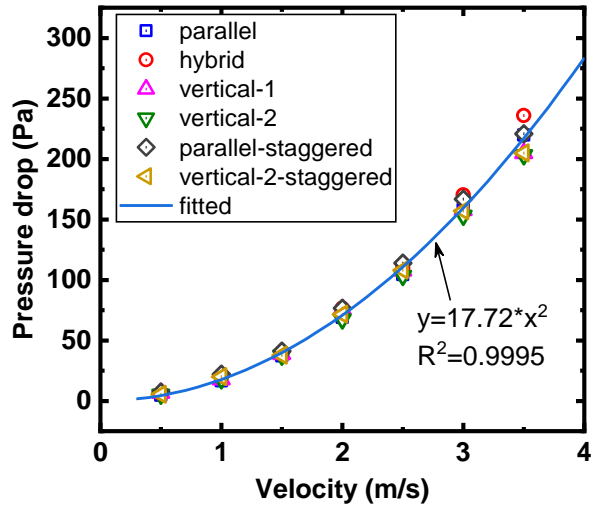

Figure S1. The pressure drops across the plasma reactors as a function of inlet airflow velocity. The average data were fitted by a parabolic function ( $y=k \cdot x^2$ ,  $R^2=0.9995$ ).

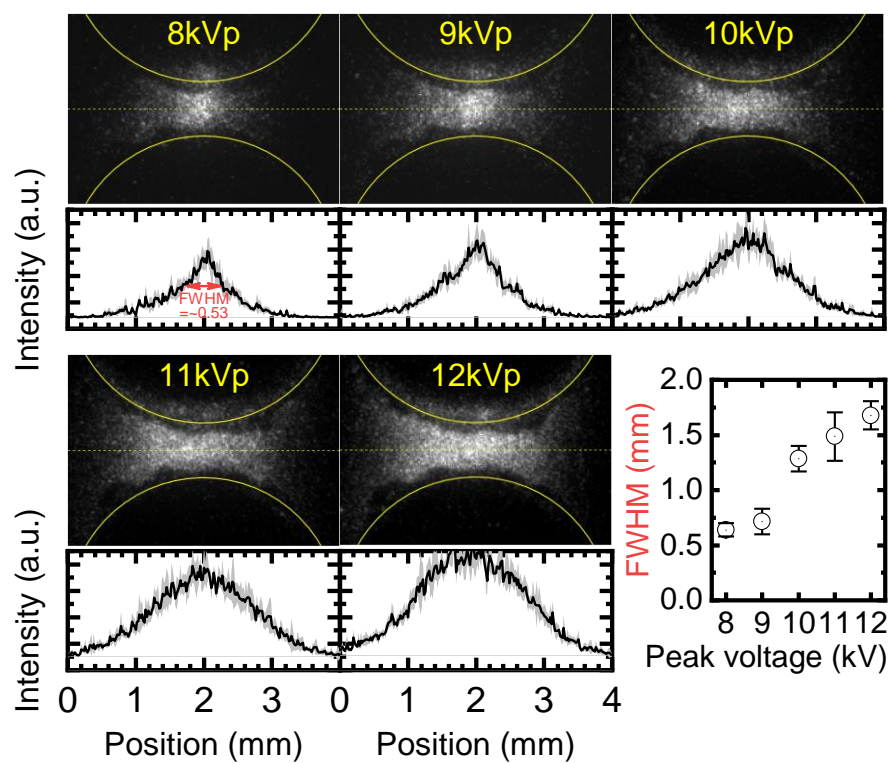

Figure S2. ICCD images of discharge filaments of pair-wise electrodes from the side view with 1 ms exposure time. The full width at half maxima (FWHM) values of the discharge filaments as a function of applied voltage is also shown. **Under higher applied voltages, the accumulation of discharge filaments leads to a wider emission region.**



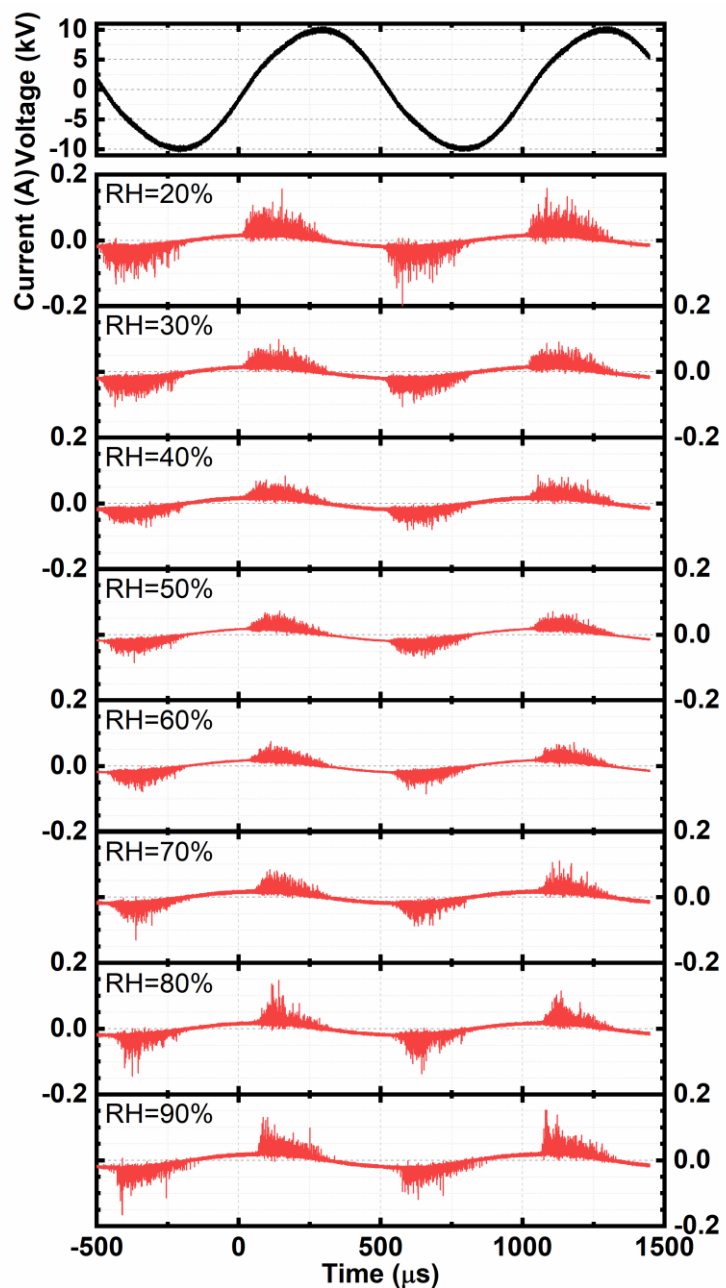

Figure S3. The voltage and current waveforms of the vertical-2 reactor as a function of RH levels. The voltage was fixed at 10 kVp.

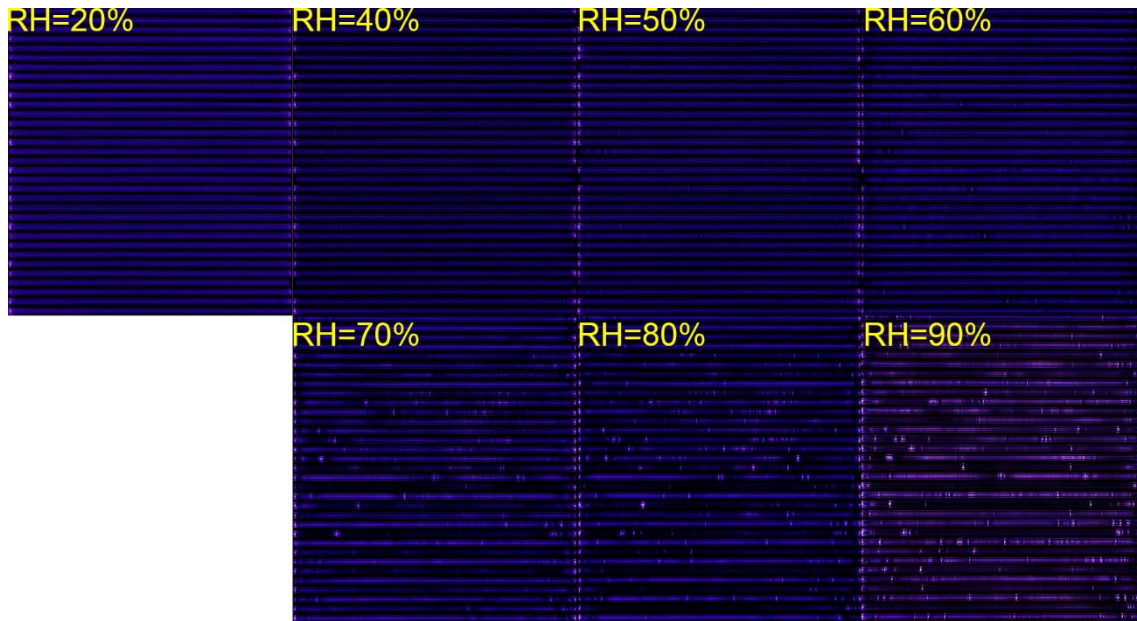

Figure S4. Discharge photos of 'vertical-1' DBD reactor at different relative humidity (RH) levels. The peak voltage is 10 kVp and the frequency is 1 kHz. The exposure time is 30 s. **Clearly, discharge uniformity is disrupted under high RH values (>60%).**

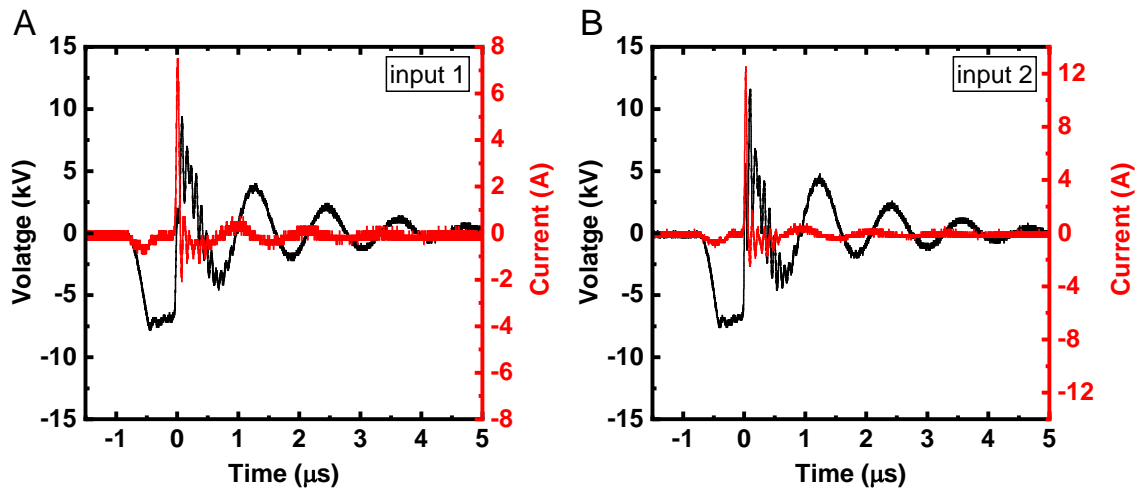

Figure S5. The voltage and current waveforms of the pulsed power source output. The frequency is fixed at 1 kHz. 'Input-1' and 'input-2' corresponds to peak voltages of 9.4 and 11.6 kV, respectively.
